# Supplementary material
Source: HighWire-hosted journal article supplement (http://www.qdcxjkg.com/highwire/filestream/112845/field_highwire_adjunct_files/0/01050-2005_Suppl._data.pdf)
Supplement: 01050-2005_Suppl._data.pdf [file 01050-2005_Suppl._data.pdf]

TABLE 1. Mean values and 95% confidence intervals for the differences in airway resistance (dRaw), tissue elastance (dH) and the natural logarithm of the number of crackles (dln(NC)) following methacholine administrations while a PEEP of 1 or 4 hPa was maintained

|                                              |        |        | M5    | M10   | M20   | M40     |
|----------------------------------------------|--------|--------|-------|-------|-------|---------|
| dRaw (cmH <sub>2</sub> O·s·l <sup>-1</sup> ) | PEEP 4 | Mean   | 0.038 | 0.321 | 1.49  | 4.93    |
|                                              |        | 95% CI | 3.0   | 3.65  | 3.90  | 4.15    |
|                                              |        | p      | 0.95  | 0.72  | 0.13  | <0.0001 |
|                                              | PEEP 1 | Mean   | 0.367 | 1.41  | 7.35  | 22.1    |
|                                              |        | 95% CI | 11.0  | 13.2  | 14.2  | 15.2    |
|                                              |        | p      | 0.89  | 0.66  | 0.043 | <0.0001 |
| dH (cmH <sub>2</sub> O·l <sup>-1</sup> )     | PEEP 4 | Mean   | -2.27 | -1.25 | 3.23  | 21.3    |
|                                              |        | 95% CI | 18.9  | 24.8  | 28.2  | 31.4    |
|                                              |        | p      | 0.56  | 0.83  | 0.64  | 0.0043  |
|                                              | PEEP 1 | Mean   | 0.914 | 0.868 | 23.3  | 52.2    |
|                                              |        | 95% CI | 37.6  | 49.4  | 56.2  | 63.3    |
|                                              |        | p      | 0.92  | 0.94  | 0.10  | 0.0003  |
| dln(NC)                                      | PEEP4  | Mean   | 4.78  | 5.37  | 5.89  | 7.78    |
|                                              |        | 95% CI | 7.74  | 10.7  | 12.84 | 14.9    |
|                                              |        | p      | 0.018 | 0.049 | 0.040 | 0.041   |
|                                              | PEEP1  | Mean   | 0.04  | 0.23  | 0.57  | 1.89    |
|                                              |        | 95% CI | 0.60  | 0.84  | 1.02  | 1.21    |
|                                              |        | p      | 0.79  | 0.25  | 0.029 | <0.0001 |

M5–M40: methacholine doses of 5–40 µg·kg<sup>-1</sup>.
